# Supplementary material for: Drug repurposing and computational modeling for discovery of inhibitors of the main protease (Mpro) of SARS-CoV-2
Source: Royal Society of Chemistry journal article supplement (doi:10.1039/d1ra03956c), 2021-01-01
Supplement: d1ra03956c6.pdf [file d1ra03956c6.pdf]

## Drug Repurposing and Computational Modeling for Discovering of

### Inhibitors of the Main Protease ( $M^{pro}$ ) of SARS-CoV-2

José Rogério A. Silva, Hendrik G. Kruger and Fábio A. Molfetta

#### Supplementary Information

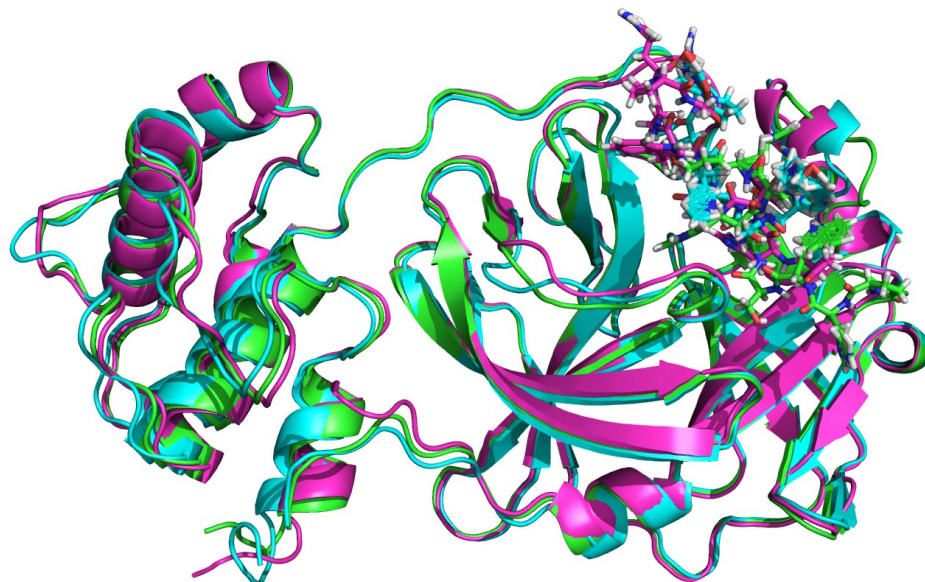

**Fig. S1** Overlay of average structures of  $M^{pro}$ –triptorelin systems of 3 MD runs performed using random seed with different atomic velocities after 100 ns of MD simulations (RMSD =  $0.76 \pm 0.20$  Å).

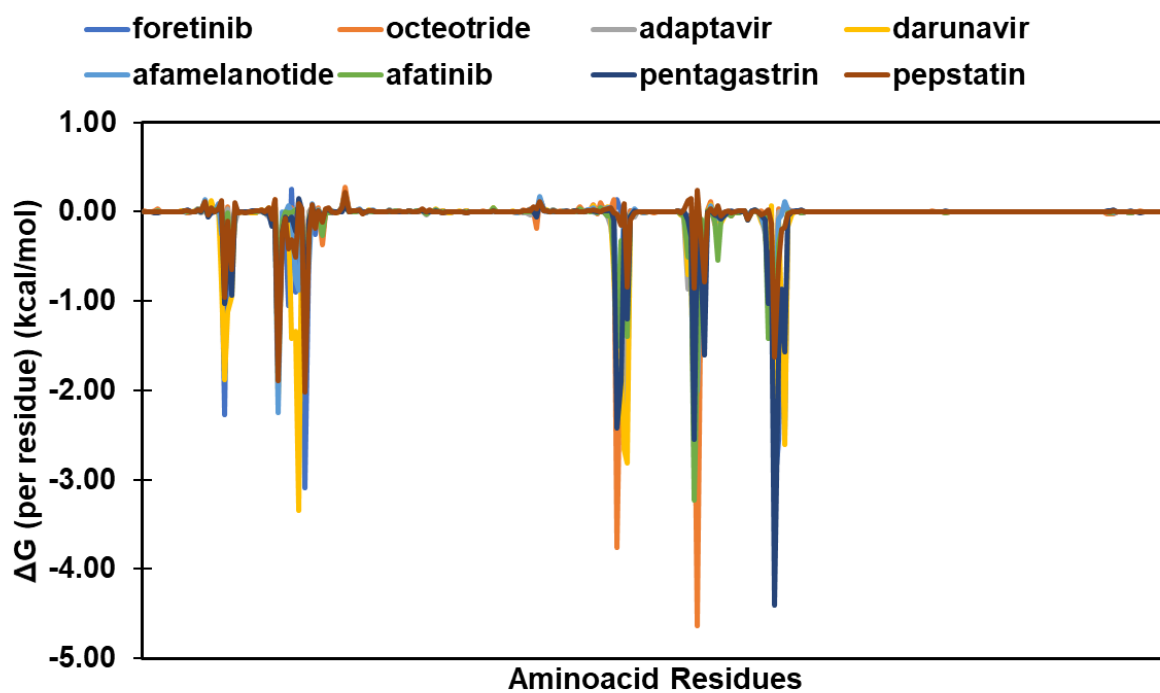

**Fig. S2** Per-residue binding free energy decomposition (in kcal/mol) for other  $M^{pro}$ -drug systems.
